# Supplementary material for: Inferring sparse networks for noisy transient processes
Source: PubMed Central journal article supplement (PMC4768174; doi:10.1038/srep21963), 2016-02-26
Supplement: srep21963-s1.pdf [file srep21963-s1.pdf]

## Supplementary information:

### Inferring sparse networks for noisy transient processes

Hoang M. Tran<sup>1,2</sup>, Satish T.S Bukkapatnam<sup>1</sup>

1 Department of Industrial & Systems Engineering, Texas A&M University, College Station, TX 77840, USA

2 School of Applied Mathematics & Informatics, Hanoi University of Science & Technology, Hanoi, Vietnam

#### Theoretical results in the Section “network inference when total influence matrix is available”

**Lemma 1.**  $\|\Delta S\|_F$  can be bounded as

$$\|\Delta S\|_F \leq \gamma + O(\delta^2 + \gamma^2 + \delta\gamma), \quad (32)$$

according to Feizi et al.<sup>26</sup> where  $\gamma$  and  $\delta$  are the largest eigenvalues of  $\Delta G$  and  $G$ , respectively satisfy  $\gamma \ll 1, \delta < 1$  or

$$\|\Delta S\|_F \leq \frac{\|\Delta G\|_F}{(1 - \|G\|_F - \|\Delta G\|_F)(1 - \|G\|_F)}, \quad (33)$$

provided

$$1 - \|G\|_F - \|\Delta G\|_F > 0. \quad (34)$$

*Proof.* From (11), it follows that

$$\begin{aligned} G^0 + \Delta G &= S^0 + S^0 G^0 + S^0 \Delta G \\ &\quad + \Delta S + \Delta S G^0 + \Delta S \Delta G \\ \Leftrightarrow \Delta G &= S^0 \Delta G + \Delta S + \Delta S G^0 + \Delta S \Delta G \\ \Leftrightarrow \Delta G &= G^0 (I + G^0)^{-1} \Delta G + \Delta S (I + G^0 + \Delta G) \\ \Rightarrow \Delta S &= ((I + G^0)(I + G^0)^{-1} - G^0 (I + G^0)^{-1}) \\ &\quad \Delta G (I + G^0 + \Delta G)^{-1} \\ \Rightarrow \Delta S &= (I + G^0)^{-1} \Delta G (I + G^0 + \Delta G)^{-1} \\ \Rightarrow \|\Delta S\|_F &= \|(I + G^0)^{-1} \Delta G (I + G^0 + \Delta G)^{-1}\|_F \end{aligned}$$

$$\begin{aligned}
&= \|(I - (-G^0))^{-1} \Delta G (I - (-G))^{-1}\|_F \\
&\stackrel{a}{\leq} \|(I - (-G^0))^{-1}\|_F \|\Delta G\|_F \|(I - (-G))^{-1}\|_F \\
&\stackrel{b}{\leq} \frac{1}{1 - \|(-G)\|_F} \|\Delta G\|_F \frac{1}{1 - \|G\|_F} \\
&\stackrel{c}{\leq} \frac{1}{1 - \|G\|_F - \|\Delta G\|_F} \|\Delta G\|_F \frac{1}{1 - \|G\|_F}
\end{aligned}$$

We have (a) because of the sub-multiplicative property  $\|AB\|_F \leq \|A\|_F \|B\|_F$ . for (b) to hold:

$$\|G^0\|_F < 1 \quad (35)$$

$$\|-G\|_F < 1 \quad (36)$$

Because  $\|G^0\|_F = \|G - \Delta G\|_F \leq \|G\|_F + \|\Delta G\|_F$ , sufficient condition for (35,36) to hold is  $\|G\|_F + \|\Delta G\|_F \leq 1$ .

We have (c) because

$$\begin{aligned}
1 - \|G^0\|_F &\geq 1 - \|G\|_F - \|\Delta G\|_F > 0 \\
\Rightarrow \frac{1}{1 - \|G^0\|_F} &\leq \frac{1}{1 - \|G\|_F - \|\Delta G\|_F}
\end{aligned}$$

Therefore, we have (33). □

Note that the restriction (34) is reasonable as  $G$  can be linearly scaled<sup>26</sup> such that  $\|G\|_F$  is small enough to qualify Eq. (34).

The following theorem provides bounds on total perturbation based on this lemma.

**Theorem 1.**  $\varepsilon_i$  and  $\mathcal{E}$  can be bounded as follows

$$\varepsilon_i = (\|\Delta G \mathbf{s}_i^0\|_2 + \|\mathbf{g}_i - \mathbf{g}_i^0\|_2)^2 \leq 2(\|\mathbf{g}_i - \mathbf{g}_i^0\|_2^2 + \|\Delta G\|_F \frac{1}{\sqrt{1 - \delta_K}} (\|\mathbf{g}_i\|_2 + \|\mathbf{g}_i - \mathbf{g}_i^0\|_2)^2), \quad (15)$$

$$\mathcal{E} = \|\Delta S G + \Delta S\|_F \approx \mathcal{E}^{(1)} = (1 + \|G\|_F) \gamma \quad (13)$$

and

$$\mathcal{E} = \|\Delta S G + \Delta S\|_F \leq \mathcal{E}^{(2)} \quad (14)$$

where  $\mathcal{E}^{(2)} = (1 + \|G\|_F) \frac{\|\Delta G\|_F}{(1 - \|G\|_F - \|\Delta G\|_F)(1 - \|G\|_F)}$ .

*Proof.* Apply the Lemma 2 of Herman & Strohmer<sup>35</sup> to  $\Phi^0 = G^0 + I$  and  $K$ -sparse vector  $\mathbf{s}_i^0$ , we have

$$\|(G^0 + I) \mathbf{s}_i^0\|_2 \geq \sqrt{1 - \delta_K} \|\mathbf{s}_i^0\|_2.$$

Also, by applying the Cauchy Schwarz inequality, we have  $\|\Delta G \mathbf{s}_i^0\|_2 \leq \|\Delta G\|_F \|\mathbf{s}_i^0\|_2$ . Therefore,

$$\begin{aligned} \frac{\|\Delta G \mathbf{s}_i^0\|_2}{\|(G^0 + I) \mathbf{s}_i^0\|_2} &\leq \frac{\|\Delta G\|_F \|\mathbf{s}_i^0\|_2}{\sqrt{1 - \delta_K} \|\mathbf{s}_i^0\|_2} \\ \Rightarrow \frac{\|\Delta G \mathbf{s}_i^0\|_2}{\|(G^0 + I) \mathbf{s}_i^0\|_2} &\leq \frac{\|\Delta G\|_F}{\sqrt{1 - \delta_K}} \\ \Rightarrow \|\Delta G \mathbf{s}_i^0\|_2 &\leq \frac{\|\Delta G\|_F}{\sqrt{1 - \delta_K}} \|\mathbf{s}_i^0\|_2 \end{aligned}$$

As a result,

$$\begin{aligned} 2(\|\Delta G \mathbf{s}_i^0\|_2^2 + \|\mathbf{g}_i - \mathbf{g}_i^0\|_2^2) &\leq 2 \left( \left( \frac{\|\Delta G\|_F}{\sqrt{1 - \delta_K}} \|\mathbf{s}_i^0\|_2 \right)^2 + \|\mathbf{g}_i - \mathbf{g}_i^0\|_2^2 \right) \\ &\leq 2 \left( \left( \frac{\|\Delta G\|_F}{\sqrt{1 - \delta_K}} (\|\mathbf{g}_i\|_2 + \|\delta \mathbf{g}_i\|_2) \right)^2 + \|\mathbf{g}_i - \mathbf{g}_i^0\|_2^2 \right) \end{aligned}$$

On the other hand,

$$2(\|\Delta G \mathbf{s}_i^0\|_2^2 + \|\mathbf{g}_i - \mathbf{g}_i^0\|_2^2) \geq (\|\Delta G \mathbf{s}_i^0\|_2 + \|\mathbf{g}_i - \mathbf{g}_i^0\|_2)^2$$

Therefore, we have (15).

Proof of (13):

$$\begin{aligned} \|\Delta S G + \Delta S\|_F &\leq \|\Delta S G\|_F + \|\Delta S\|_F \\ &\leq \|\Delta S\|_F \|G\|_F + \|\Delta S\|_F \\ &\approx \gamma(1 + \|G\|_F) \end{aligned}$$

as

$$\|\Delta S\|_F \approx \gamma, \tag{37}$$

according to.<sup>27</sup>

Proof of (14):

$$\begin{aligned} \|\Delta S G + \Delta S\|_F &\leq \|\Delta S\|_F \|G\|_F + \|\Delta S\|_F \\ &\leq (1 + \|G\|_F) \frac{\|\Delta G\|_F}{(1 - \|G\|_F - \|\Delta G\|_F)(1 - \|G\|_F)} \end{aligned}$$

□

Next we show that  $S^*$  obtained based on the foregoing results is a good approximation of  $S^0$ .

**Theorem 2.** <sup>35</sup> Assume that  $\mathbf{s}_i^0$  is the sparsest solution of the Problem (10) and

$$\delta_{2K} < \frac{\sqrt{2}}{(1 + \varepsilon_{\Phi^0}^{(2K)})^2} - 1,$$

there exists positive constants  $C_0, C_1$  such that

$$\|\mathbf{s}_i^* - \mathbf{s}_i^0\|_2 \leq \frac{C_0}{\sqrt{K}} \|\mathbf{s}_i^0 - \mathbf{s}_i^{(K)}\|_2 + C_1 \varepsilon_i \quad (38)$$

where  $\mathbf{s}_i^*$  is solution of the  $\ell_1$ -min problem (10).

*Proof.* This is a direct application of Theorem 2 in Herman & Strohmer<sup>35</sup> with  $\mathbf{x} = \mathbf{s}_i^0, \hat{\mathbf{b}} = \mathbf{g}_i, \mathbf{z}^* = \mathbf{s}_i^*, \hat{A} = G + I$ . Note that  $C_0, C_1$  are constants depending on  $\varepsilon_{\Phi^0}^{(2K)}$ .  $\square$

When the true solution  $\mathbf{s}_i^0$  has at most  $K$  nonzero elements, the result Eq. (38) can be further simplified as follows.

**Corollary 1.** When  $\mathbf{s}_i^0$  has at most  $K$  nonzero elements,

$$\|\mathbf{s}_i^* - \mathbf{s}_i^0\|_2 \leq C_1 \varepsilon_i. \quad (39)$$

*Proof.* When  $\mathbf{s}_i^0$  is a  $K$ -sparse vector,  $\mathbf{s}_i^0 = \mathbf{s}_i^{(K)}$ . Eq. (38) becomes Eq. (39).  $\square$

The assumption in this corollary is reasonable since most of real world networks tend to be sparse. The results in Eqs. (38,39) are formulated for each row of  $S^0$ . In terms of the whole matrix, the robustness of computing  $S^0$  can be guaranteed by the following theorem.

**Theorem 3.** Let  $S^*$  be the solution of the  $\ell_1$ -min formulation (9). The error when approximating  $S^0$  by  $S^*$  is bounded by

$$\|S^* - S^0\|_F^2 \leq C_1 \mathcal{E} \quad (40)$$

where  $\mathcal{E}$  is bounded as  $\mathcal{E} \leq 2 \left( \frac{1}{1 - \delta_K} \|G^0\|_F^2 + 1 \right) \|\Delta G\|_F^2$ .

*Proof.* Apply the Corollary 1 to the Problem 10 with  $\varepsilon_i = 2 \left( \|\Delta G\|_F \frac{1}{\sqrt{1 - \delta_K}} \|\mathbf{g}_i^0\|_2 \right)^2 + 2 \|\mathbf{g}_i - \mathbf{g}_i^0\|_2^2$  we have

$$\begin{aligned} \|\mathbf{s}_i^* - \mathbf{s}_i^0\|_2^2 &\leq 2C_1 \left( \|\Delta G\|_F \frac{1}{\sqrt{1 - \delta_K}} \|\mathbf{g}_i^0\|_2 \right)^2 + 2C_1 \|\mathbf{g}_i - \mathbf{g}_i^0\|_2^2 \\ \Rightarrow \sum_{i=1}^n \|\mathbf{s}_i^* - \mathbf{s}_i^0\|_2^2 &\leq 2C_1 \sum_{i=1}^n \left( \|\Delta G\|_F \frac{1}{\sqrt{1 - \delta_K}} \|\mathbf{g}_i^0\|_2 \right)^2 + 2C_1 \sum_{i=1}^n \|\mathbf{g}_i - \mathbf{g}_i^0\|_2^2 \\ &= 2C_1 \left( \|\Delta G\|_F \frac{1}{\sqrt{1 - \delta_K}} \right)^2 \sum_{i=1}^n (\|\mathbf{g}_i^0\|_2)^2 + 2C_1 \sum_{i=1}^n \|\mathbf{g}_i - \mathbf{g}_i^0\|_2^2 \\ \Rightarrow \|S^* - S^0\|_F^2 &\leq 2C_1 \left( \|\Delta G\|_F \frac{1}{\sqrt{1 - \delta_K}} \right)^2 \|G^0\|_F^2 + 2C_1 \|\Delta G\|_F^2. \end{aligned}$$

□

Theorems 2, 3 and Corollary 1 taken together guarantee that inference error when estimating  $S^0$  by  $S^*$  is at most linear with total perturbation noise. This observation is further verified using numerical investigations presented in the first case study.

**Proposition 1.** *Let  $\hat{G}^{(1)}, \dots, \hat{G}^{(N)}$  be  $N$  different measurements or estimates of the total influence matrix  $G^0$ . Let  $\hat{S}^{(r)}$  be the direct influence matrix computed from  $\hat{G}^{(r)}$  using different methods, including ND and  $\ell_1$ -min approach with different bounds. If  $\text{Var}(\hat{S}^{(r)})$  are bounded then  $E\|\bar{S}^{(N)} - S^0\|^2 \rightarrow 0$  as  $N \rightarrow \infty$ , where  $\bar{S}^{(N)} = \frac{1}{N} \sum_{r=1}^N \hat{S}^{(r)}$ .*

*Proof.* Under perfect reconstruction per ND,  $\hat{S} = S^0 + \Delta S^*$  satisfies

$$\hat{S}(G^0 + \Delta G + I) = (G^0 + \Delta G)$$

For the  $r^{\text{th}}$  realization of  $\Delta G$ , we have

$$\begin{aligned} \hat{S}_r(G^0 + \Delta G_r + I) &= (G^0 + \Delta G_r) \\ \Rightarrow \hat{S}_r &= (G^0 + \Delta G_r)(G^0 + \Delta G_r + I)^{-1} \end{aligned}$$

As  $\Delta G_r$  are independent,  $\hat{S}_r$  are independent.

$$\begin{aligned} \text{Var}(\bar{S}^{(N)} - S^0) &= \text{Var}\left(\frac{\sum_{r=1}^N \hat{S}_r}{N} - S^0\right) \\ &= \text{Var}\left(\frac{\sum_{r=1}^N (\hat{S}_r - S^0)}{N}\right) \\ &= \frac{1}{N^2} \text{Var}\left(\sum_{r=1}^N (\hat{S}_r - S^0)\right) \\ &= \frac{1}{N^2} \sum_{r=1}^N \text{Var}(\hat{S}_r - S^0) \quad (\text{As } \hat{S}_r - S^0 \text{ are independent}) \end{aligned}$$

If  $\text{Var}(\hat{S}_r - S^0)$  is bounded by some constant  $C$  for all  $r$ ,

$$\text{Var}(\bar{S}^{(N)} - S^0) \leq \frac{1}{N^2} \sum_{r=1}^N C = \frac{C}{N} \rightarrow 0 \text{ as } N \rightarrow \infty$$

□

### Theoretical results in the Section “Network inference when the time series under transient conditions are available (total influence matrix not given)”

The errors in the estimation of  $R, \Gamma$  can be expressed based on the following lemma

**Lemma 2.**

$$\begin{aligned}
(\Delta R)_{ik}(t) &= (e_{ik}^{(1)}(t) - e_{ik}^{(2)}(t)) / \Delta p_k \\
(\Delta \Gamma)_{ik}(t) &= \frac{[(e_{ik}^{(1)}(t + \Delta t) - e_{ik}^{(2)}(t + \Delta t)) - (e_{ik}^{(1)}(t) - e_{ik}^{(2)}(t))]}{\Delta t \Delta p_k}
\end{aligned}$$

where  $e_{ik}^{(1)}(t), e_{ik}^{(2)}(t)$  are the errors incurred when measuring  $x_i^0(t, p_k), x_i^0(t, p_k + \Delta p_k)$ , respectively.

*Proof.*

$$\begin{aligned}
R_{ik}^0(t) &\approx (x_i^0(t, p_k + \Delta p_k) - x_i^0(t, p_k)) / \Delta p_k & (41) \\
R_{ik}(t) &\approx ((x_i^0(t, p_k + \Delta p_k) + e_{ik}^{(2)}(t)) - (x_i^0(t, p_k) + e_{ik}^{(1)}(t))) / \Delta p_k \\
&= ((x_i^0(t, p_k + \Delta p_k) - x_i^0(t, p_k)) + (e_{ik}^{(2)}(t) - e_{ik}^{(1)}(t))) / \Delta p_k \\
&\approx R_{ik}^0(t) + (e_{ik}^{(2)}(t) - e_{ik}^{(1)}(t)) / \Delta p_k \\
\Delta R_{ik}(t) &= (e_{ik}^{(2)}(t) - e_{ik}^{(1)}(t)) / \Delta p_k \\
\Gamma_{ik}(t) &\approx (R_{ik}(t + \Delta t) - R_{ik}(t)) / \Delta t \\
&= \left[ R_{ik}^0(t + \Delta t) + (e_{ik}^{(2)}(t + \Delta t) - e_{ik}^{(1)}(t + \Delta t)) / \Delta p_k \right] / \Delta t - \\
&\quad \left[ R_{ik}^0(t) + (e_{ik}^{(2)}(t) - e_{ik}^{(1)}(t)) / \Delta p_k \right] / \Delta t \\
&= [R_{ik}^0(t + \Delta t) - R_{ik}^0(t)] / \Delta t + \\
&\quad \left[ (e_{ik}^{(2)}(t + \Delta t) - e_{ik}^{(1)}(t + \Delta t)) - (e_{ik}^{(2)}(t) - e_{ik}^{(1)}(t)) \right] / (\Delta t \Delta p_k) \\
&= \Gamma_{ik}^0(t) + \left[ (e_{ik}^{(2)}(t + \Delta t) - e_{ik}^{(1)}(t + \Delta t)) - (e_{ik}^{(2)}(t) - e_{ik}^{(1)}(t)) \right] / (\Delta t \Delta p_k) \\
\Delta \Gamma_{ik}(t) &= \left[ (e_{ik}^{(2)}(t + \Delta t) - e_{ik}^{(1)}(t + \Delta t)) - (e_{ik}^{(2)}(t) - e_{ik}^{(1)}(t)) \right] / (\Delta t \Delta p_k)
\end{aligned}$$

□

Based on this lemma, the total perturbation can be estimated by the following theorem.

**Theorem 4.** *The total perturbation for the problem (21) is  $\Gamma - S^0 R = (\Delta S) R$  and is bounded by the following quantity*

$$\mathcal{E} \leq (\|\Gamma\|_F + \|\Delta \Gamma\|_F) \frac{\|R^{-1} \Delta R\|_F}{1 - \|R^{-1} \Delta R\|_F} + \|\Delta \Gamma\|_F \quad (23)$$

when  $\|R^{-1} \Delta R\|_F < 1$ .

*Proof.*

$$\begin{aligned}\Gamma &= SR \\ \Rightarrow \Gamma &= (S^0 + \Delta S)R \\ \Rightarrow \Gamma - S^0R &= (\Delta S)R\end{aligned}$$

$(\Delta S)R$  is called total perturbation.

We have

$$A^{-1} - (A + E)^{-1} = \sum_{k=1}^{\infty} (-1)^{k+1} (A^{-1}E)^k A^{-1} \quad (42)$$

Apply (42) to  $A = R, E = \Delta R = R^0 - R$ , we have

$$R^{-1} - (R + R^0 - R)^{-1} = \sum_{k=1}^{\infty} (-1)^{k+1} (R^{-1}\Delta R)^k R^{-1}$$

Also,

$$\Gamma^0 = S^0 R^0 \quad (43)$$

$$\Rightarrow S^0 = \Gamma^0 (R^0)^{-1} \quad (44)$$

$$S = \Gamma R^{-1} \quad (45)$$

$$\Rightarrow \Delta S = \Gamma R^{-1} - \Gamma^0 (R^0)^{-1} \quad (46)$$

$$= (\Gamma^0 + \Delta\Gamma)R^{-1} - \Gamma^0 (R^0)^{-1} \quad (47)$$

$$= \Gamma^0 (R^{-1} - (R^0)^{-1}) + \Delta\Gamma R^{-1} \quad (48)$$

$$= (\Gamma - \Delta\Gamma)(R^{-1} - (R^0)^{-1}) + \Delta\Gamma R^{-1} \quad (49)$$

$$(\Delta S)R = ((\Gamma - \Delta\Gamma)(R^{-1} - (R^0)^{-1}) + \Delta\Gamma R^{-1})R \quad (50)$$

$$= (\Gamma - \Delta\Gamma)(R^{-1} - (R^0)^{-1})R + \Delta\Gamma \quad (51)$$

Therefore,

$$\begin{aligned}
(\Delta S)R &= (\Gamma - \Delta\Gamma)(R^{-1} - (R^0)^{-1})R + \Delta\Gamma \\
&= (\Gamma - \Delta\Gamma)\left(\sum_{k=1}^{\infty} (-1)^{k+1} (R^{-1}\Delta R)^k R^{-1}\right)R + \Delta\Gamma \text{ (if } \|R^{-1}\Delta R\|_F < 1) \\
\|(\Delta S)R\|_F &\leq (\|\Gamma\|_F + \|\Delta\Gamma\|_F)\left(\sum_{k=1}^{\infty} (\|R^{-1}\Delta R\|_F)^k\right) + \|\Delta\Gamma\|_F \\
&= (\|\Gamma\|_F + \|\Delta\Gamma\|_F)\frac{\|R^{-1}\Delta R\|_F}{1 - \|R^{-1}\Delta R\|_F} + \|\Delta\Gamma\|_F
\end{aligned}$$

□

Similar to Theorem 4, the total perturbation  $\varepsilon_i$  for the problem (22) can be estimated using the following theorem.

**Theorem 5.**  $\varepsilon_i$  can be bounded as follows:

$$\varepsilon_i = \|((\Delta S)R)'_i\| \leq \frac{\|R^{-1}\Delta R\|_F}{1 - \|R^{-1}\Delta R\|_F} \|[(\Gamma - \Delta\Gamma)'_i]\| + \|(\Delta\Gamma')_i\| \quad (24)$$

or

$$\varepsilon_i = \|((\Delta S)R)'_i\| \approx \|R^{-1}\Delta R\| \|[(\Gamma - \Delta\Gamma)'_i]\| + \|(\Delta\Gamma')_i\| \quad (25)$$

The following proposition suggests that the network structure can be estimated via an averaging procedure along the lines of Proposition 1.

**Proposition 2.** Let  $\hat{\Gamma}(t_r)$ , ( $r = 1..N$ ) be a measurement or approximation of the total influence matrix  $\Gamma^0(t)$  at time  $t_r$ . Let  $\hat{S}(t_r)$  be the direct influence matrix computed from  $\hat{\Gamma}(t_r)$  using different methods, including ND or  $\ell_1$ -min formulation with different bounds and  $\bar{S}^{(N)} = \frac{1}{N} \sum_{r=1}^N \hat{S}(t_r)$ . Then  $\forall (i, j)$  satisfying  $s_{ij}^0(t) = 0, \forall t$ ,  $E|\bar{S}_{ij}^{(N)}|^2 \rightarrow 0$  as  $N \rightarrow \infty$ .

*Proof.* Under perfect reconstruction per ND,  $\hat{S} = S^0 + \Delta S$  satisfies

$$\hat{S}R = \Gamma$$

For the  $r^{th}$  realization of  $\Delta\Gamma_r, \Delta R_r$ , we have

$$\begin{aligned}
\hat{S}(t_r)(R^0 + \Delta R_r) &= \Gamma_r^0 + \Delta\Gamma_r \\
\Rightarrow \hat{S}(t_r) &= (\Gamma_r^0 + \Delta\Gamma_r)(R^0(t_r) + \Delta R_r)^{-1}
\end{aligned} \quad (52)$$



As  $(\Delta\Gamma_{r_1}, \Delta R_{r_1})$  and  $(\Delta\Gamma_{r_2}, \Delta R_{r_2})$  are independent if  $r_1 \neq r_2$ ,  $\hat{S}_{r_1}$  and  $\hat{S}_{r_2}$  are independent. Therefore,

$$\text{Var}((\bar{S}^{(N)})_{ij}) = \frac{1}{N^2} \text{Var}\left(\sum_{r=1}^N (\hat{S}(t_r))_{ij}\right) = \frac{1}{N^2} \sum_{r=1}^N \text{Var}((\hat{S}(t_r))_{ij})$$

Assume that  $\text{Var}((\hat{S}(t_r))_{ij})$  are bounded by a constant  $C$ , for all  $r$ ,

$$\begin{aligned} \text{Var}((\bar{S}^{(N)})_{ij}) &\leq \frac{1}{N^2} NC = \frac{C}{N} \\ \Rightarrow \text{Var}((\bar{S}^{(N)})_{ij}) &\rightarrow 0 \text{ as } N \rightarrow \infty. \end{aligned}$$

□
